# Supplementary material for: Determination of active sites on the synthesis of novel Lewis acidic deep eutectic solvent catalysts and kinetic studies in microalgal biodiesel production
Source: Royal Society of Chemistry journal article supplement (doi:10.1039/d3ra00543g), 2023-01-01
Supplement: d3ra00543g1.pdf [file d3ra00543g1.pdf]

## Supplimentary data

### Determination of active sites on the synthesis novel Lewis acidic deep eutectic solvent catalyst and kinetic studies in the microalgal biodiesel production

Ange Douglas Potchamyou Ngatcha<sup>1</sup>, Anqi Zhao<sup>2</sup>, Shen Zhang<sup>1,3</sup>, Wenlong Xiong<sup>1, 3</sup>, Moinuddin Sarker<sup>4</sup>, Jingliang Xu<sup>\*1,3</sup>, Md. Asraful Alam<sup>\*1,3</sup>

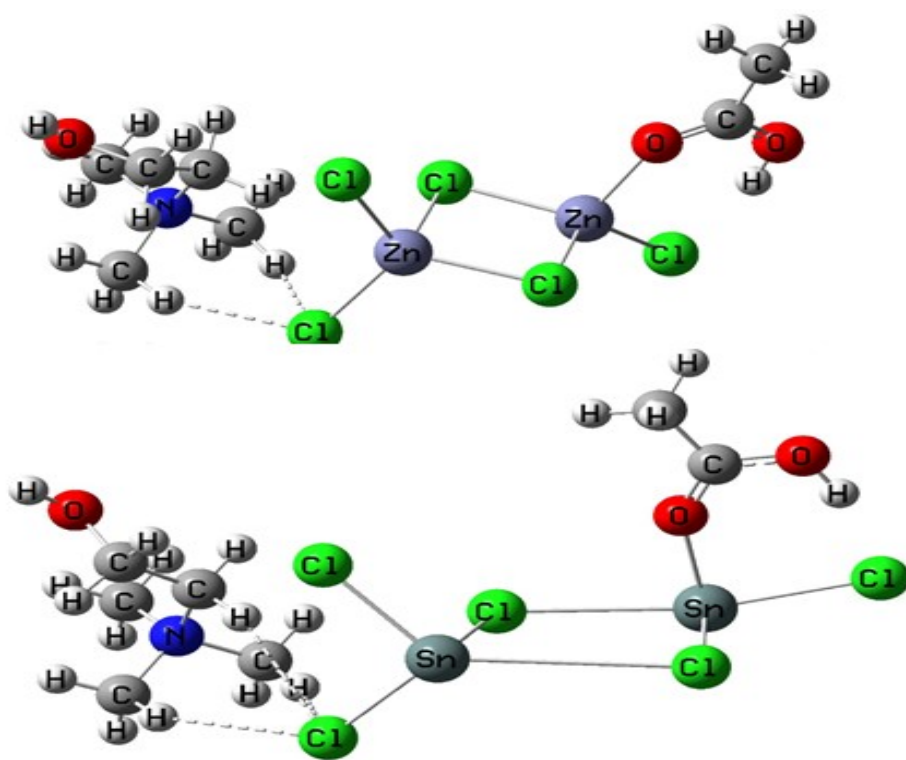

**Figure S1.** Optimized structures of AC adsorbed on ChCl.MCl<sub>2</sub> (1/2) (M = Zn and Sn).
